# Supplementary material
Source: bioRxiv or medRxiv preprint supplement (https://www.biorxiv.org/highwire/filestream/2256/field_highwire_adjunct_files/10/008862-19.pdf)

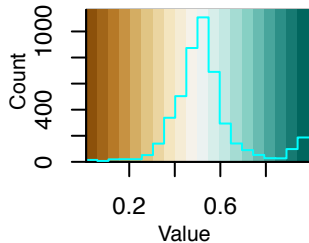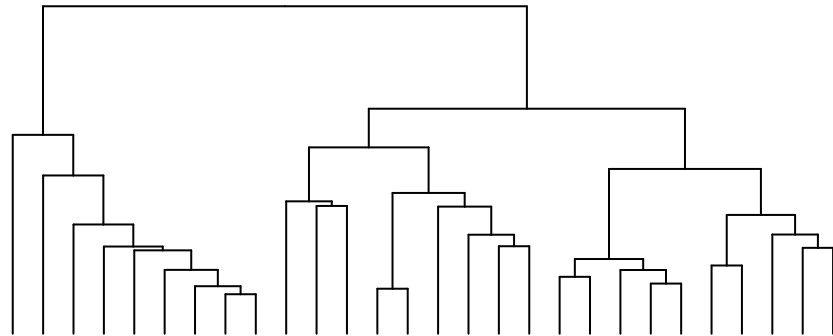

- Chimpanzee iPSCs
- Chimpanzee fibroblasts
- Human iPSCs
- Human fibroblasts
- Human LCLs

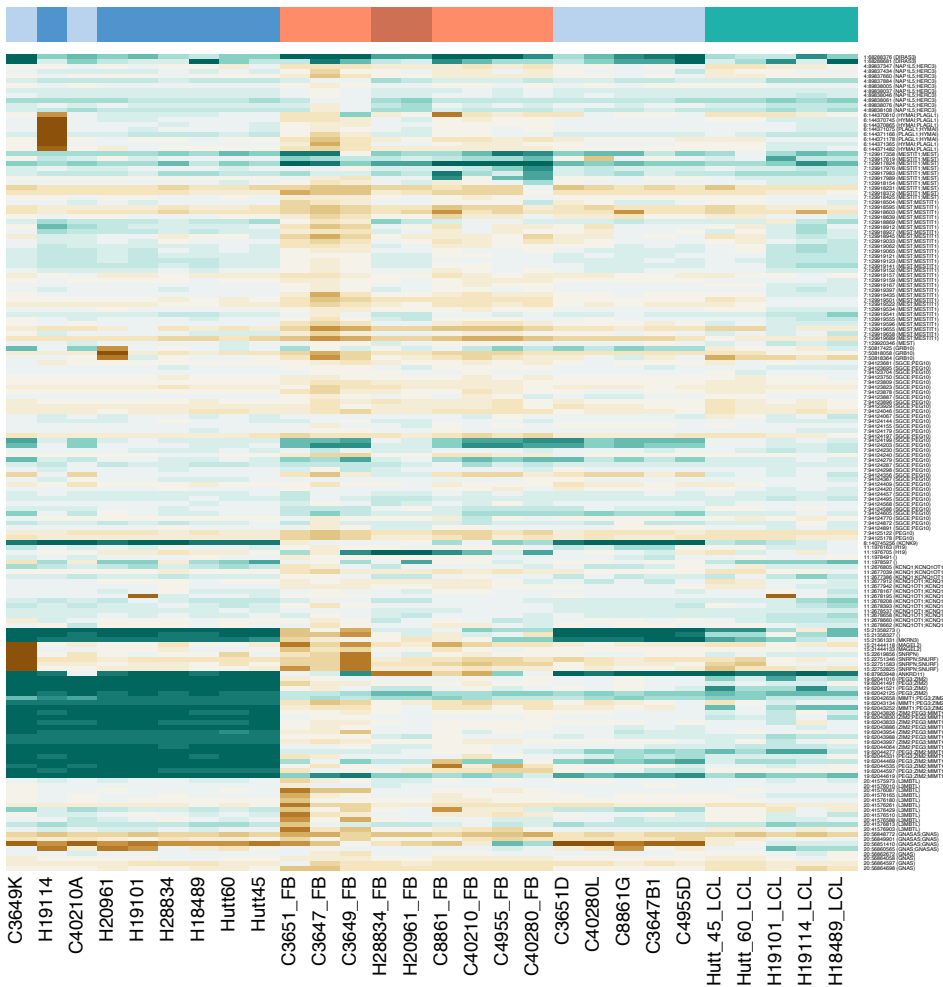

Supplement: Supplementary file [file 008862-19.pdf]
